# Supplementary material for: MAP4K4 exacerbates cardiac microvascular injury in diabetes by facilitating S-nitrosylation modification of Drp1
Source: Springer Nature journal article supplement (doi:10.1186/s12933-024-02254-7), 2024-05-09

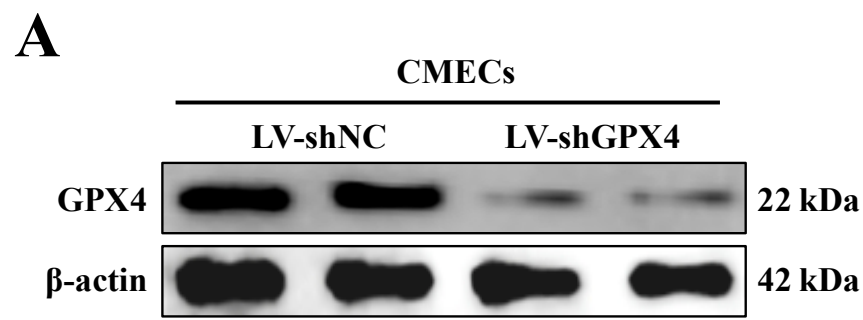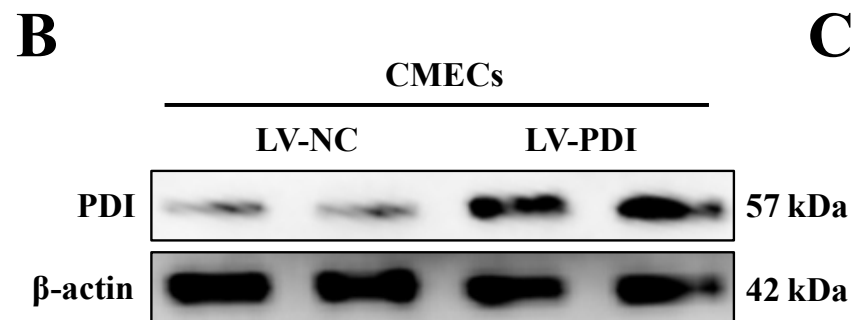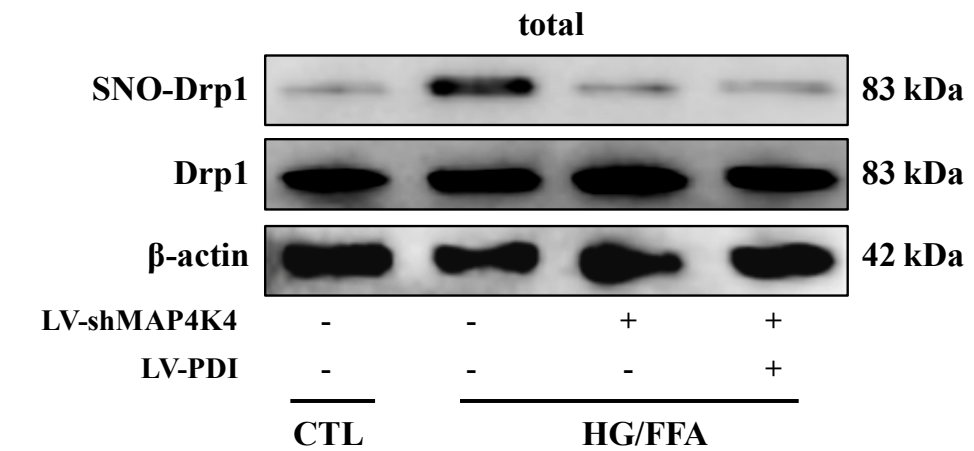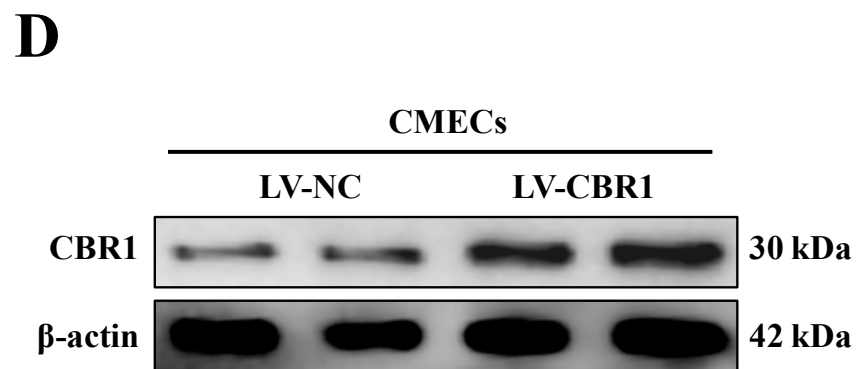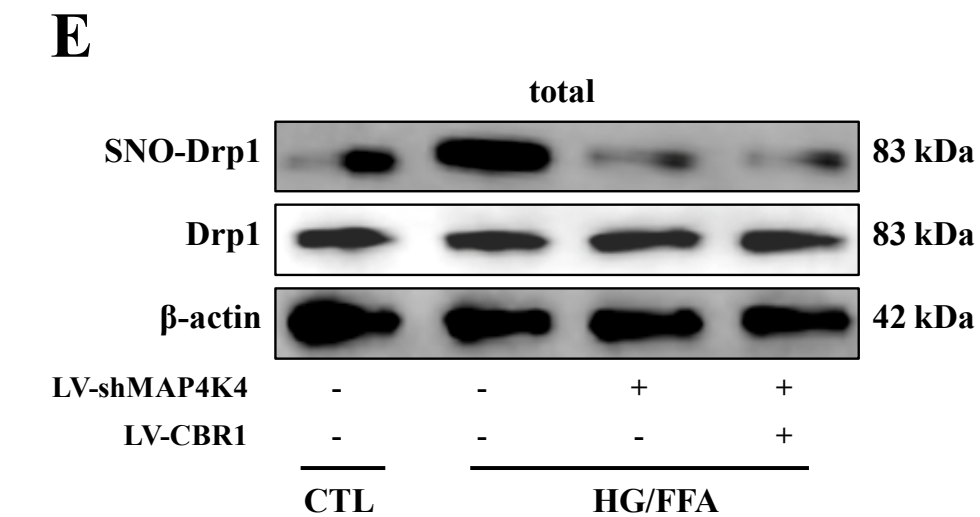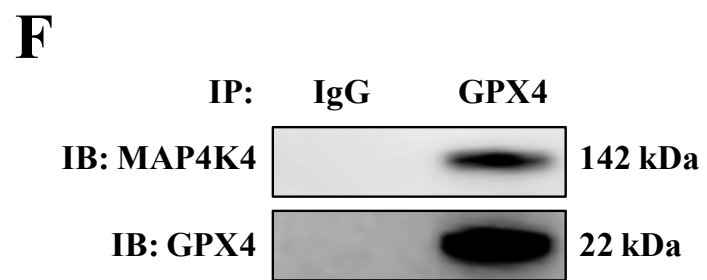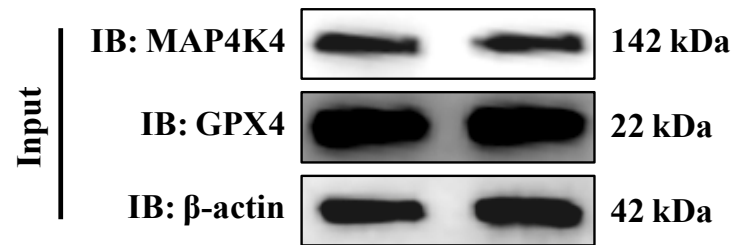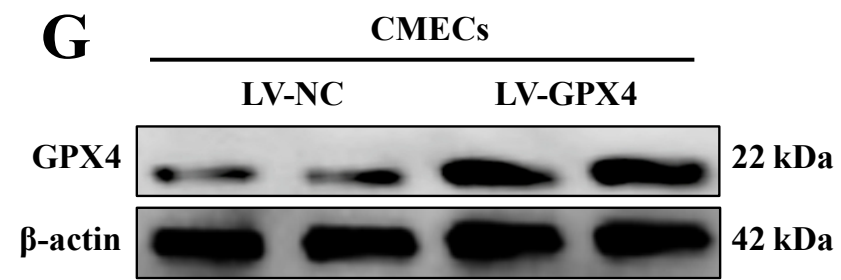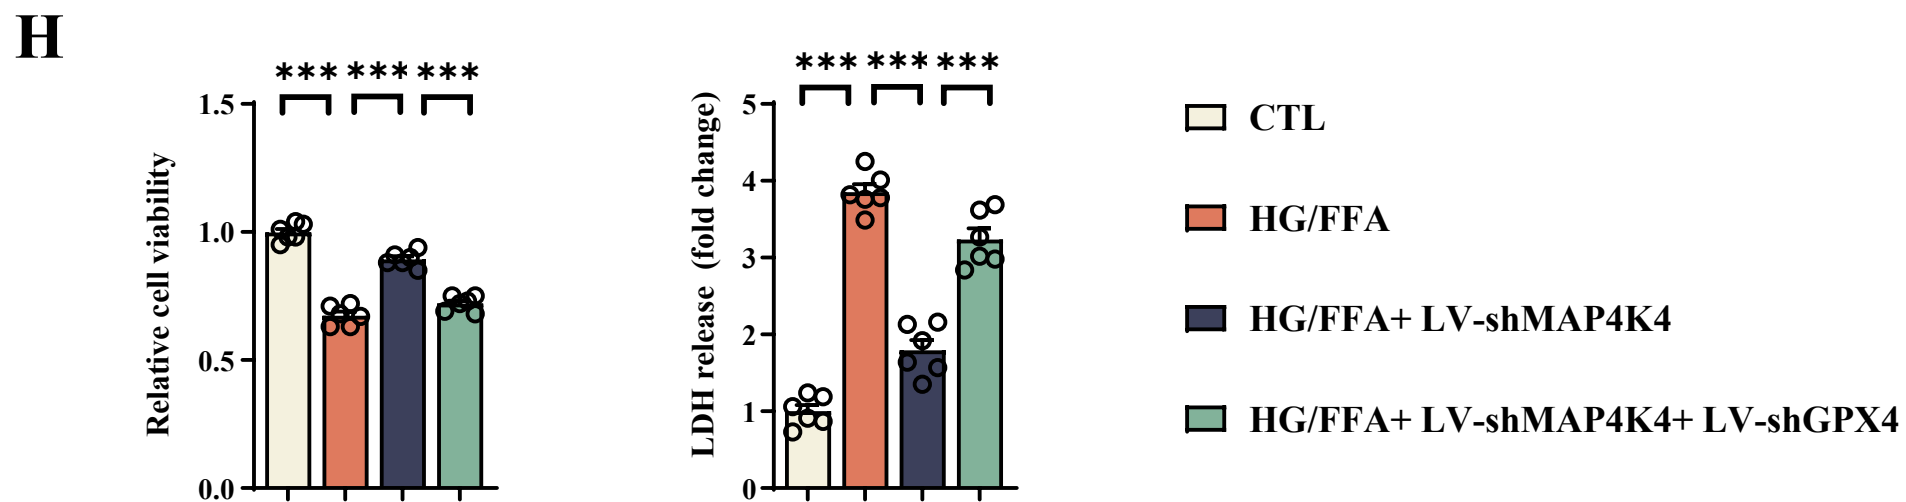

Supplement: MOESM2 [file 27072726]
