# Supplementary material for: MAP4K4 exacerbates cardiac microvascular injury in diabetes by facilitating S-nitrosylation modification of Drp1
Source: Springer Nature journal article supplement (doi:10.1186/s12933-024-02254-7), 2024-05-09

**A**

|                        |                |                    |     |
|------------------------|----------------|--------------------|-----|
| Homo sapiens Drp1      | <u>497–514</u> | KHPDFADACGLMNNNIEE | 505 |
| Mus musculus Drp1      | <u>503–520</u> | KHPDFADACGLMNNNIEE | 511 |
| Rattus norvegicus Drp1 | <u>510–527</u> | KHPDFADACGLMNNNIEE | 518 |
| Bos taurus Drp1        | <u>510–527</u> | KHPDFADACGLMNNNIEE | 518 |
| Danio rerio Drp1       | <u>496–513</u> | KHPDFADACGLMNNNIEE | 504 |

**B**

|                        |                |                    |     |
|------------------------|----------------|--------------------|-----|
| Homo sapiens Drp1      | <u>636–653</u> | LSAREQRDCEVIERLIKS | 644 |
| Mus musculus Drp1      | <u>642–659</u> | LSAREQRDCEVIERLIKS | 650 |
| Rattus norvegicus Drp1 | <u>655–672</u> | LSAREQRDCEVIERLIKS | 663 |
| Bos taurus Drp1        | <u>649–666</u> | LSAREQRDCEVIERLIKS | 657 |
| Danio rerio Drp1       | <u>591–608</u> | LSAREQRDCEVIERLIKS | 599 |

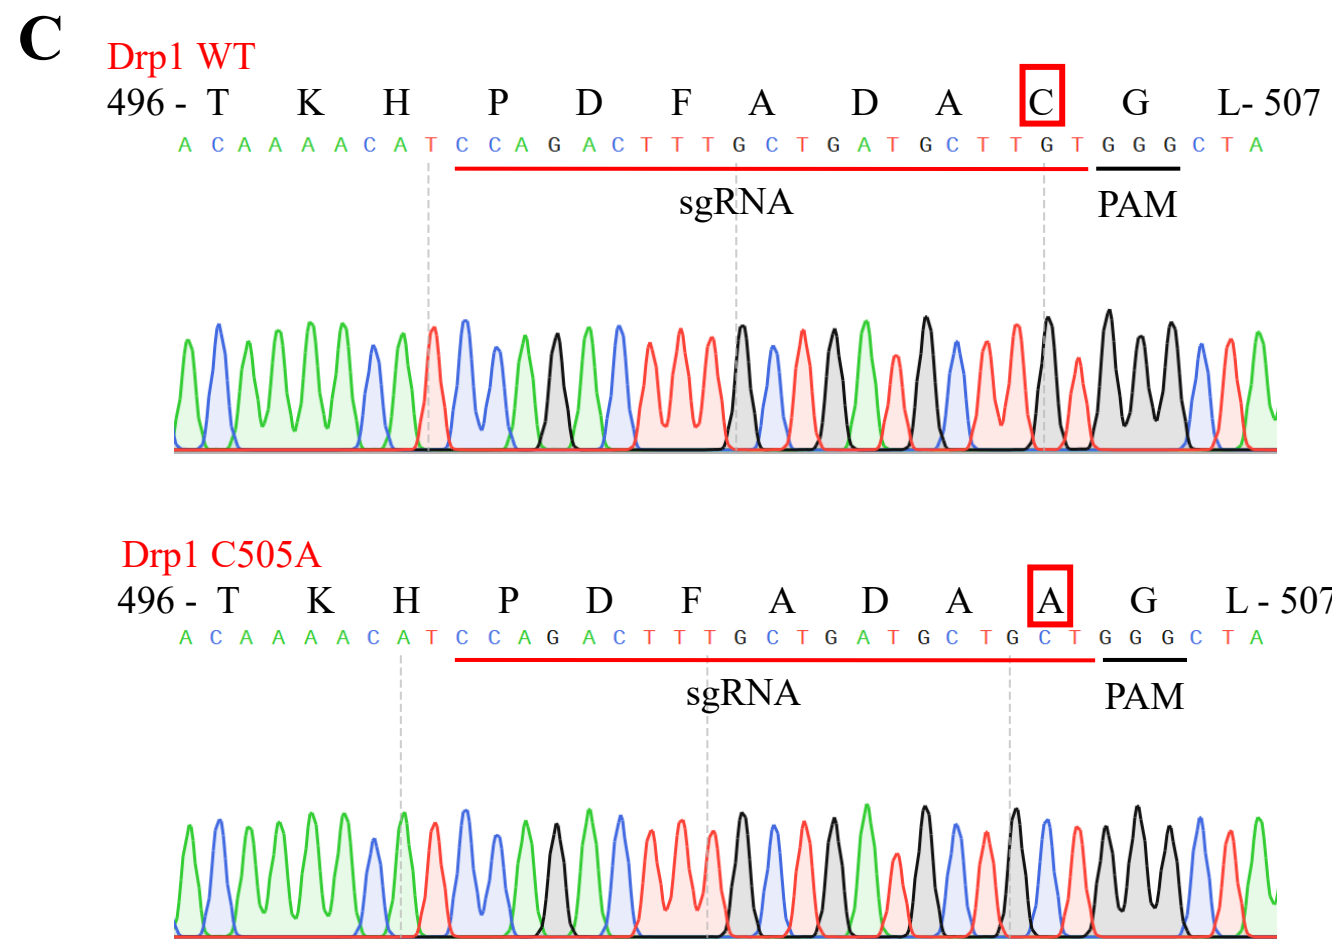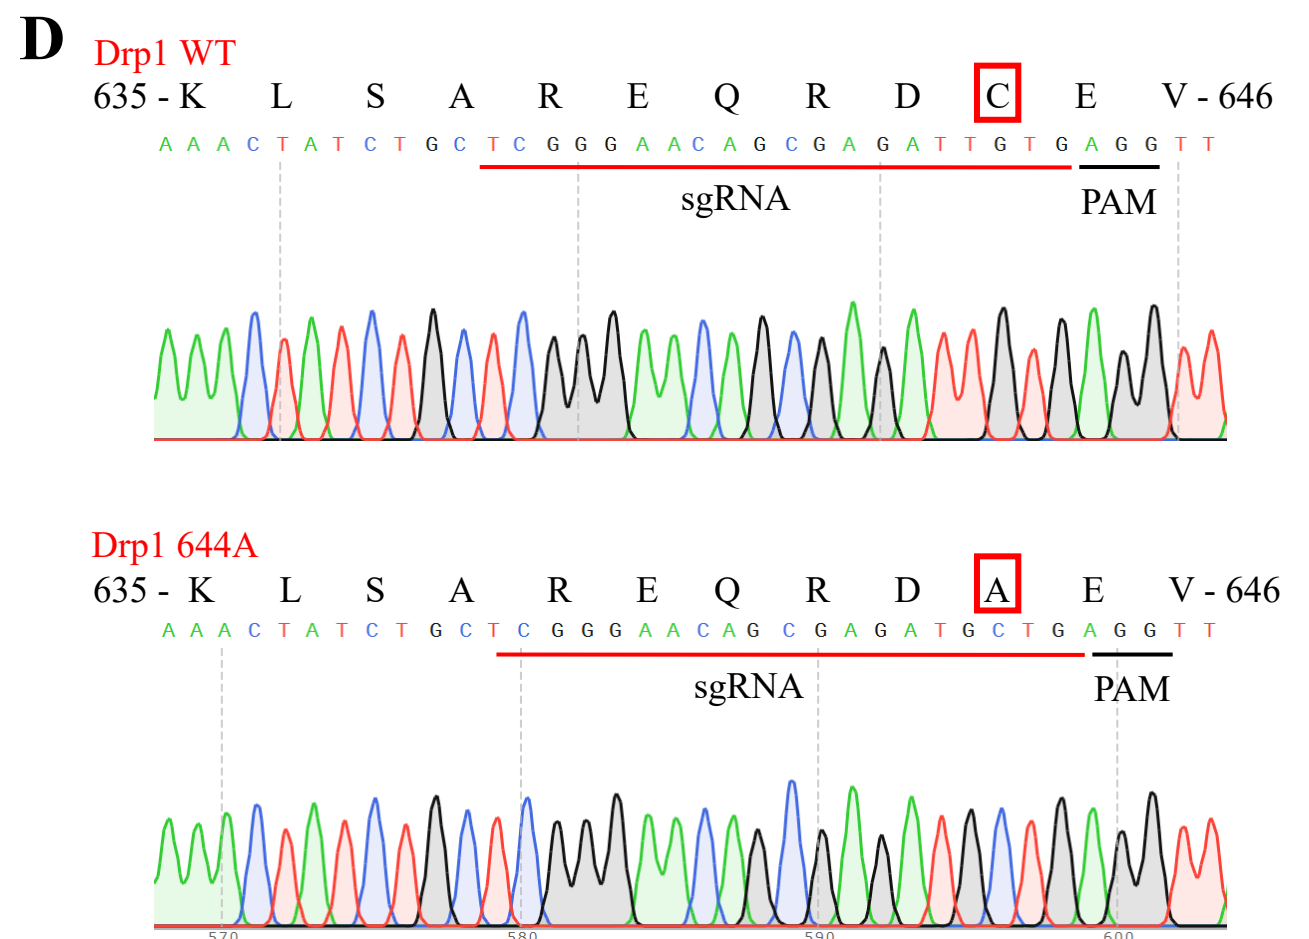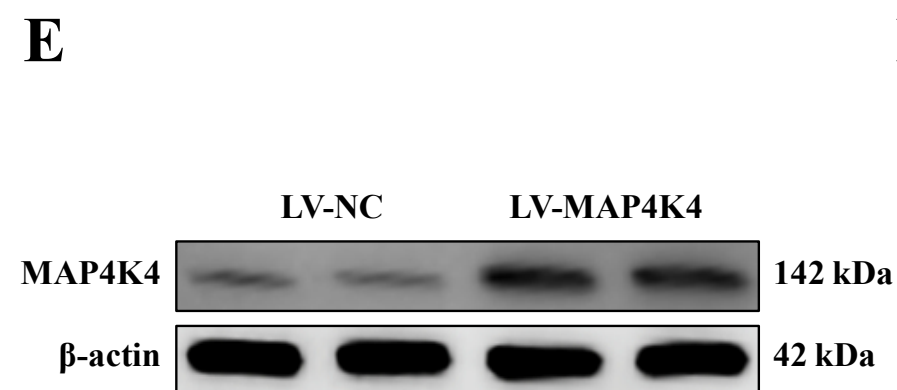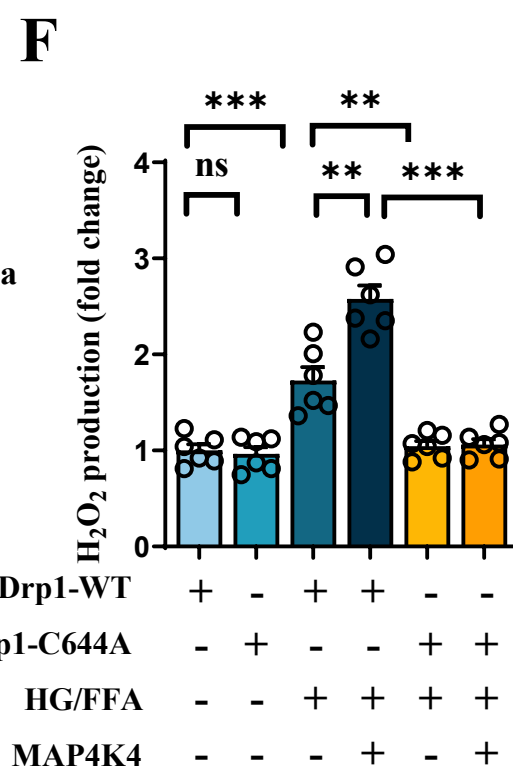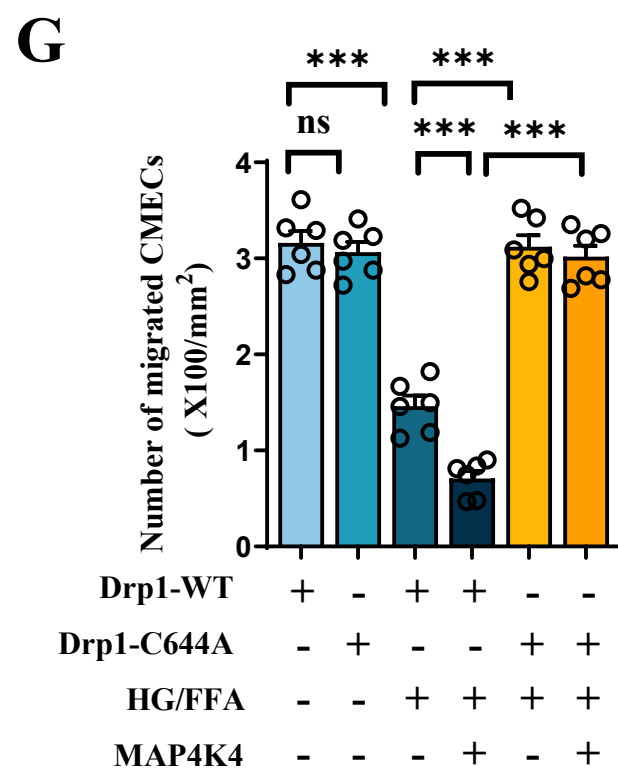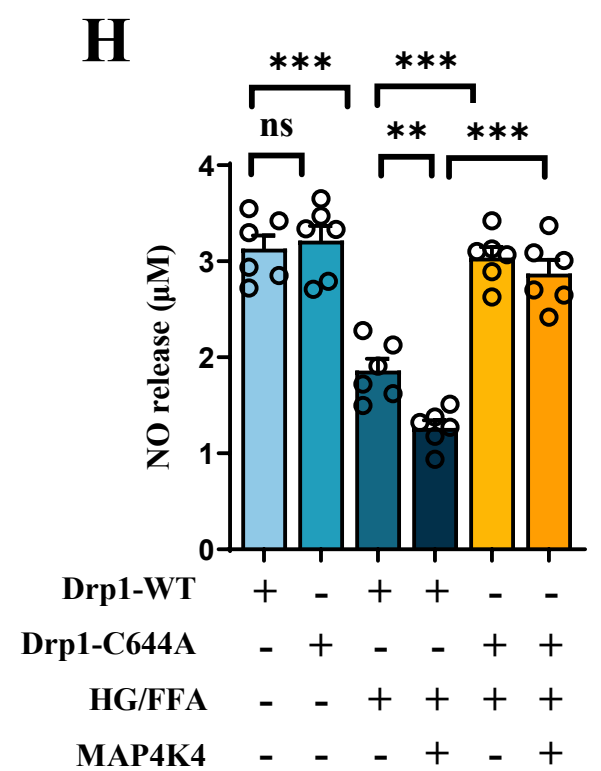

Supplement: MOESM3 [file 27072726]
