# Supplementary material for: MAP4K4 exacerbates cardiac microvascular injury in diabetes by facilitating S-nitrosylation modification of Drp1
Source: Springer Nature journal article supplement (doi:10.1186/s12933-024-02254-7), 2024-05-09
Supplement: MOESM6 [file 27072726]

| Supplementary Table 1 |                                       |
|-----------------------|---------------------------------------|
| DRP1                  | Forward Primer CTGCCTCAAATCGTCGTAGTG  |
|                       | Reverse Primer GAGGTCTCCGGGTGACAATTC  |
|                       |                                       |
| Fis1                  | Forward Primer GATGACATCCGTAAAGGCATCG |
|                       | Reverse Primer AGAAGACGTAATCCCGCTGTT  |
|                       |                                       |
| Dcn                   | Forward Primer ATGAAGGCCACTATCATCCTCC |
|                       | Reverse Primer GTCGCGGTCATCAGGAACTT   |
|                       |                                       |
| Mapt                  | Forward Primer CCAAGTGTGGCTCATTAGGCA  |
|                       | Reverse Primer CCAATCTTCGACTGGACTCTGT |
|                       |                                       |
| Pink1                 | Forward Primer GGAGGAGTATCTGATAGGGCAG |
|                       | Reverse Primer AACCCGGTGCTCTTTGTCAC   |
|                       |                                       |
| Bnip3                 | Forward Primer CAGGGCTCCTGGGTAGAACT   |
|                       | Reverse Primer CTACTCCGTCCAGACTCATGC  |
|                       |                                       |
| Mief1                 | Forward Primer CACGGCCATTGACTTTGTGC   |
|                       | Reverse Primer TCGTACATCCGCTTAACTGCC  |
|                       |                                       |
| Mief2                 | Forward Primer ATGGCAGAGTTCTCCCAGAAA  |
|                       | Reverse Primer CCCTGTCAATGAACCGCTT    |
|                       |                                       |
| Mff                   | Forward Primer ACTGAAGGCATTAGTCAGCGA  |
|                       | Reverse Primer TCCTGCTACAACAATCCTCTCC |
|                       |                                       |
| Ggnbp1                | Forward Primer TCTTTGAACTGGCTTACCACG  |
|                       | Reverse Primer GCAGGATTTACGTTGCTCC    |
|                       |                                       |

|                |                                        |
|----------------|----------------------------------------|
| Senp5          | Forward Primer GGGAAGGCCAGT TACTTGGAA  |
|                | Reverse Primer CAAAGGGGTT CATCCTTGATCC |
|                |                                        |
| Ddhd2          | Forward Primer ATGTCATCAGTGCAGTCACAAC  |
|                | Reverse Primer ACTGGTTCATACAAGCTGCCA   |
|                |                                        |
| Mtfp1          | Forward Primer GTGTGCTGCCTCTCTCTATGT   |
|                | Reverse Primer TGGGGTGGATAATGATGGGGA   |
|                |                                        |
| Mtfr2          | Forward Primer AATGACCTGCCTGTAAATGAAGC |
|                | Reverse Primer TGCAATCTGAGAGCGAAGAAAAG |
|                |                                        |
| Prkn           | Forward Primer CCCACCTCTGACAAGGAAACA   |
|                | Reverse Primer TCGTGAACAAACTGCCGATCA   |
|                |                                        |
| Miga2          | Forward Primer GAAGCAGGTTGGTCCCGAG     |
|                | Reverse Primer ACTCAGGGTGTCGTTGCTCT    |
|                |                                        |
| Mfn1           | Forward Primer GAGGTGCTATCTCGGAGACAC   |
|                | Reverse Primer GCCAATCCC ACTAGGGAGAAC  |
|                |                                        |
| Mfn2           | Forward Primer GGCCCAACTCTAAGTGCCC     |
|                | Reverse Primer AAGTGCTTTTCCGTCTGCATC   |
|                |                                        |
| Opa1           | Forward Primer TGTGAGGTCTGCCAGTCTTTA   |
|                | Reverse Primer TGCCTTAATTGGGGTCGTTG    |
|                |                                        |
| $\beta$ -actin | Forward Primer CATGTACGTTGCTATCCAGGC   |
|                | Reverse Primer CTCCTTAATGTCACGCACGAT   |
|                |                                        |

Table S2 Primary antibodies used in western blots.

| Name                 | Manufacturer | Cat No.   | Dilution | Reacts with:                            |
|----------------------|--------------|-----------|----------|-----------------------------------------|
| $\beta$ -actin       | Abcam        | Ab8226    | 1:1000   | Mouse, Rat, Human                       |
| MAP4K4               | Abcam        | Ab80418   | 1:1000   | Mouse, Rat, Human                       |
| BNIP3                | Abcam        | Ab109362  | 1:1000   | Mouse, Rat, Human                       |
| GPX4                 | Abcam        | Ab125066  | 1:3000   | Mouse, Rat, Human                       |
| CD31                 | Abcam        | Ab281583  | 1:1000   | mice, human                             |
| eNOS                 | Abcam        | Ab76198   | 1:1000   | Mouse, Human                            |
| eNOS (phospho S1177) | Abcam        | Ab230158  | 1:1000   | Mouse, Human                            |
| VEGFR2               | Abcam        | Ab11939   | 1:1000   | Mouse, Rat, Human, Recombinant fragment |
| VEGFR2 (Tyr1175)     | CST          | 2478      | 1:2000   | mice, human                             |
| ICAM-1               | Affinity     | AF6088    | 1:1000   | mice, human                             |
| VCAM-1               | Abcam        | Ab134047  | 1:2000   | mice, human                             |
| Drp1                 | Abcam        | Ab184247  | 1:1000   | Mouse, Rat, Human                       |
| Drp1(Ser616)         | Bioss        | Bs-12702R | 1:300    | mice                                    |
| DRP1 (phospho S637)  | Abcam        | Ab193216  | 1:1000   | Mouse, Rat, Human                       |
| MFN1                 | Abcam        | Ab126575  | 1:200    | Mouse, Rat                              |
| VDAC1                | Abcam        | Ab154856  | 1:1000   | Mouse, Rat, Human                       |
| MIEF1                | Affinity     | DF12019   | 1:1000   | Mouse, Rat, Human                       |
| DHODH                | Abcam        | Ab246901  | 1:1000   | Mouse, Rat, Human                       |
| GSNOR                | Abcam        | Ab175406  | 1:1000   | Mouse, Rat, Human                       |
| TRX                  | Abcam        | Ab273877  | 1:1000   | Mouse, Rat                              |
| TRX2                 | Abcam        | Ab185544  | 1:10000  | Mouse, Human                            |
| GLRX1                | Abcam        | Ab45953   | 1:250    | Mouse, Rat, Human                       |
| PDI                  | Affinity     | DF7593    | 1:1000   | Mouse, Rat, Human                       |
| GPX1                 | Abcam        | Ab22604   | 1:1000   | Mouse, Rat, Human                       |
| GPX3                 | Abcam        | Ab256470  | 1:1000   | Mouse, Rat                              |
| CBR1                 | Abcam        | Ab186825  | 1:1000   | Mouse, Human                            |
| CBR3                 | Abcam        | Ab180939  | 1:10000  | Mouse, Rat, Human                       |
|                      |              |           |          |                                         |
